# Supplementary material for: Control Efficacy of UAV-Based Ultra-Low-Volume Application of Pesticide in Chestnut Orchards
Source: MDPI journal article supplement (doi:10.3390/plants12142597), 2023-07-09
Supplement: s1 [file s1]

Table S1. Infestation rate by peach moth under control with flubendiamide on adult chestnut trees over two years (2021–2022).

| Year | Cultivar | Tree age | Spraying     | Volume | Infestation rate (%) | Efficacy | p-value      |
|------|----------|----------|--------------|--------|----------------------|----------|--------------|
| 2021 | Tanzawa  | middle   | UAV          | 40L    | 1.1±1.0              | -        | 0.541        |
|      |          |          | Conventional | 2,000L | 2.2±2.6              | -        | -            |
|      |          | old      | UAV          | 40L    | 0.8±1.5              | -        | <b>0.014</b> |
|      |          |          | Conventional | 2,000L | 6.5±1.8              | -        | -            |
|      | Tsukuba  | middle   | UAV          | 40L    | 1.2±2.1              | -        | 0.588        |
|      |          |          | Conventional | 2,000L | 3.4±6.0              | -        | -            |
|      |          | old      | UAV          | 40L    | 2.8±4.9              | -        | 0.717        |
|      |          |          | Conventional | 2,000L | 1.5±2.7              | -        | -            |
| 2022 | Tanzawa  | middle   | UAV          | 40L    | 1.8±3.0              | 66       | 0.103        |
|      |          |          | -            | -      | 5.2±3.1              | -        | -            |
|      |          | old      | UAV          | 40L    | 1.4±2.4              | 92       | <b>0.046</b> |
|      |          |          | -            | -      | 16.2±4.4             | -        | -            |
|      | Tsukuba  | middle   | UAV          | 40L    | 1.1±1.2              | 81       | <b>0.004</b> |
|      |          |          | -            | -      | 5.8±0.9              | -        | -            |
|      |          | old      | UAV          | 40L    | 1.1±0.3              | 59       | <b>0.083</b> |
|      |          |          | -            | -      | 2.6±1.3              | -        | -            |

The values of infestation rate were indicated as mean ± standard deviation.

Spraying methods were as following: UAV, UAV-based ultra-low-volume spraying; Conventional, spraying with air-blast sprayer; "-", not sprayed  
*P*-values were calculated by Welch's *t*-test (two-tailed for comparison of UAV vs. Conventional; one-tailed for UAV vs. not sprayed)

Table S2. Infestation rate by chestnut weevil under control with fluvalinate on adult trees of chestnut cultivar 'Tsukuba' over two years (2021–2022).

| Year | Tree age | Spraying     | Volume | Infestation rate (%) | p-value |
|------|----------|--------------|--------|----------------------|---------|
| 2021 | middle   | UAV          | 40L    | 2.9±0.7              | 0.174   |
|      |          | Conventional | 2,000L | 19.7±13.8            | -       |
|      | old      | UAV          | 40L    | 11.2±4.6             | 0.502   |
|      |          | Conventional | 2,000L | 13.8±3.9             | -       |
| 2022 | middle   | UAV          | 40L    | 2.3±3.9              | 0.196   |
|      |          | Conventional | 2,000L | 4.7±1.6              | -       |
|      | old      | UAV          | 40L    | 4.3±3.3              | 0.468   |
|      |          | Conventional | 2,000L | 4.4±1.6              | -       |

The values of infestation rate were indicated as mean ± standard deviation.

Spraying methods were as following: UAV, UAV-based ultra-low-volume spraying; Conventional, spraying with air-blast sprayer

P-values were calculated by two-tailed Welch's *t*-test
